# Supplementary material for: A highly stretchable and sensitive strain sensor for lip-reading extraction and speech recognition
Source: Royal Society of Chemistry journal article supplement (doi:10.1039/d3tc01136d), 2023-01-01
Supplement: d3tc01136d3.pdf [file d3tc01136d3.pdf]

# Highly stretchable and sensitive strain sensor for lip-reading extraction and speech recognition

Lin cheng <sup>1</sup>, Diqing Ruan <sup>1</sup>, Yongwei He <sup>1</sup>, Jiayao Yang <sup>1</sup>, Wei Qian <sup>1</sup>, Longwei Zhu <sup>2</sup>, Pindie Zhu <sup>2</sup>, Huaping Wu<sup>3\*</sup> and Aiping Liu<sup>1\*</sup>

<sup>1</sup> Key Laboratory of Optical Field Manipulation of Zhejiang Province, School of Materials Science & Engineering, Zhejiang Sci-Tech University, Hangzhou 310018, China

<sup>2</sup> School of Information Science & Technology, Zhejiang Sci-Tech University, Hangzhou 310018, China

<sup>3</sup> Key Laboratory of Special Purpose Equipment and Advanced Processing Technology, Ministry of Education and Zhejiang Province, College of Mechanical Engineering, Zhejiang University of Technology, Hangzhou 310023, China

Corresponding Author.

\* Huaping Wu. E-mail: wuhuaping@gmail.com

\*Aiping Liu. E-mail: liuaiping1979@gmail.com

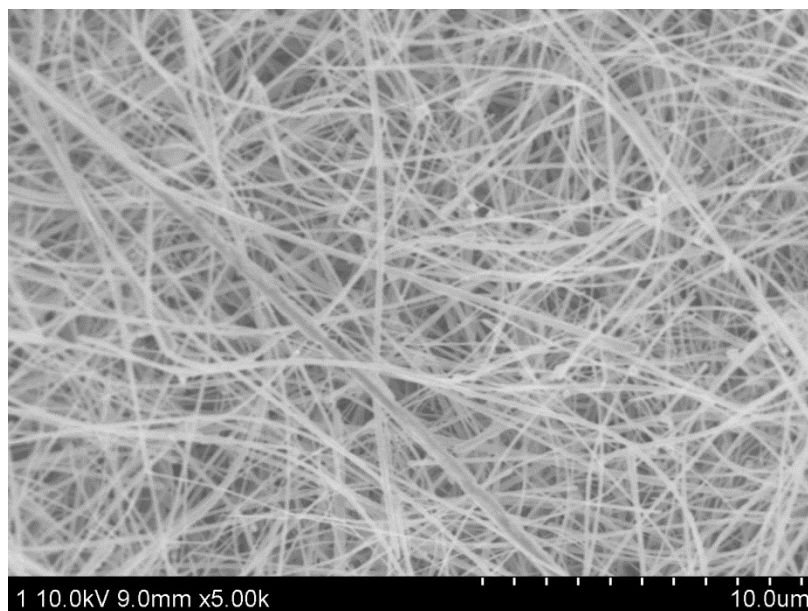

**Figure S1.** Top view SEM image of pure Cu NWs with 50-60  $\mu\text{m}$  in length and 200-300 nm in diameter.

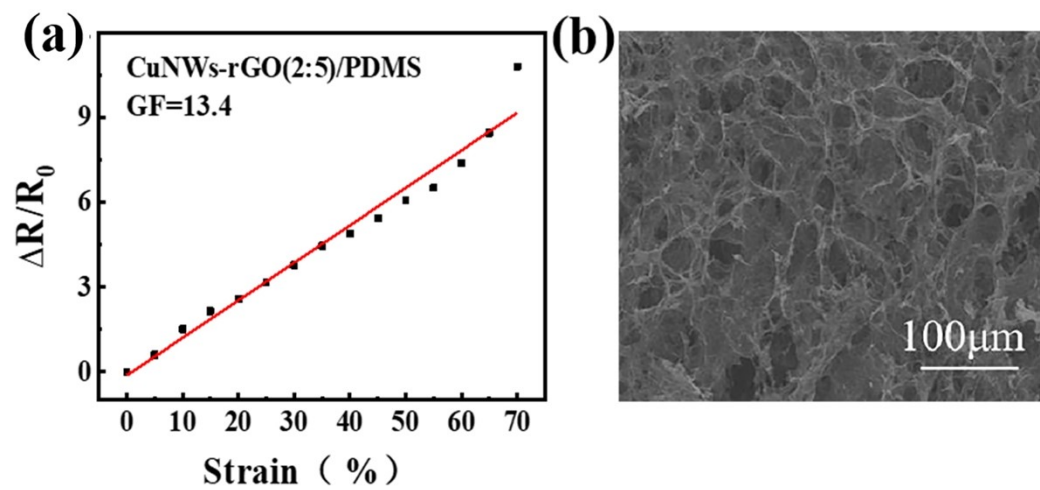

**Figure S2.** The Sensitivity of CuNWs-rGO/PDMS sensor for CuNWs to GO mass ratio of 2:5 (a) and the corresponding SEM (b).

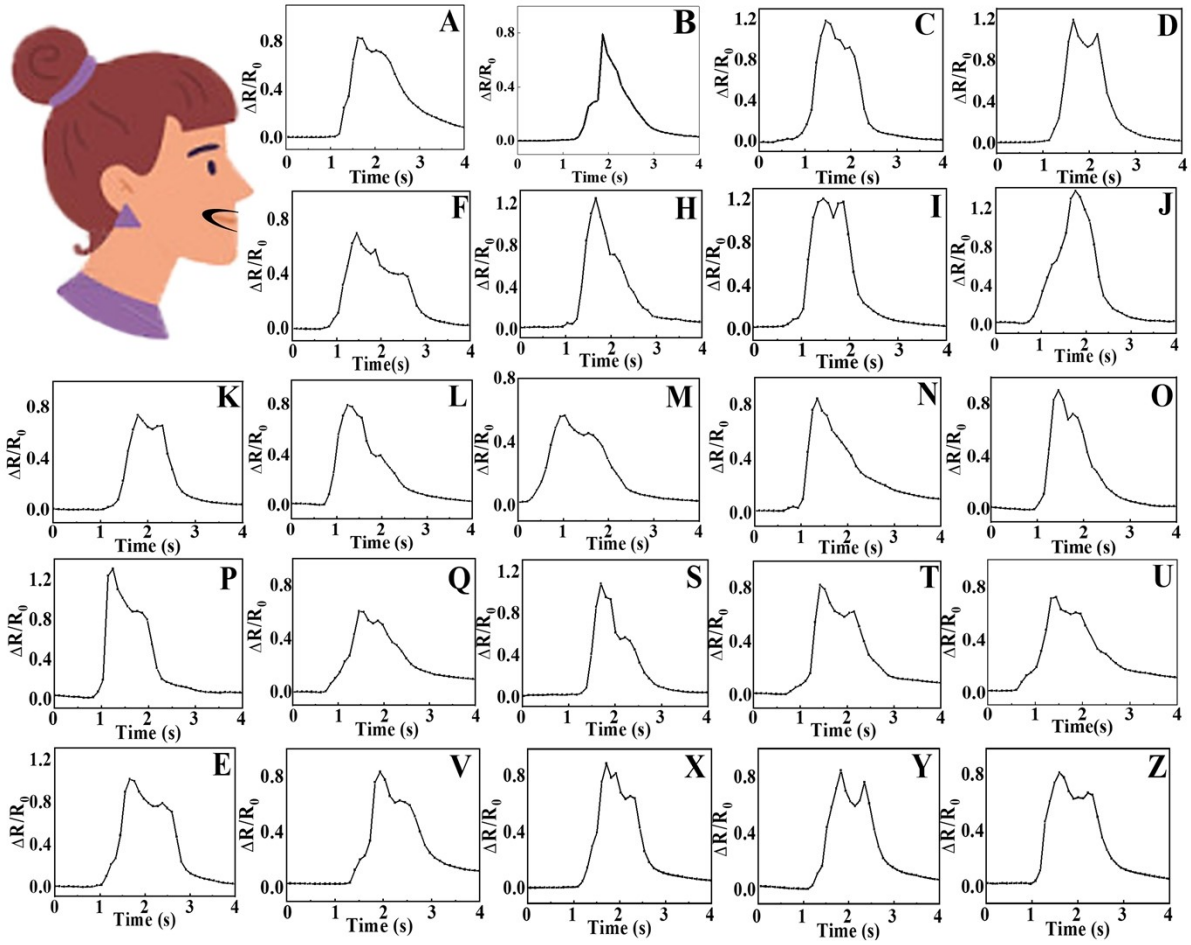

**Figure S3.** The relative resistance changes when speaking 26 English letters, of which "R", "G", "W" have already appeared in the body text.

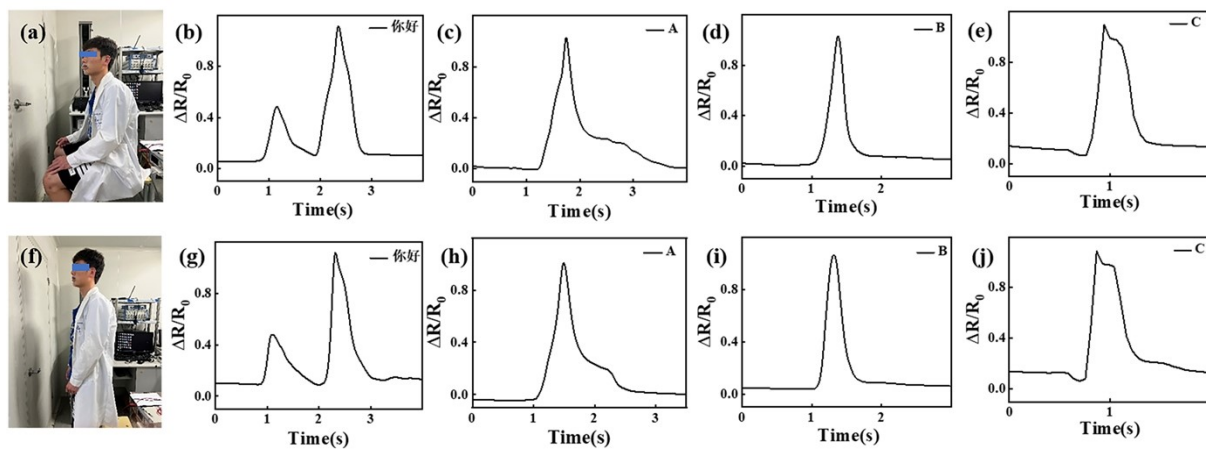

**Figure S4.** Optical images of lip reading signal testing in a stationary position (a) and during walking dynamics (f) with the sensor placed in a natural environment for two months, the corresponding relative resistance changes of the sensor when the volunteer reads "A", "B", "C" and "你好" in a stationary position (b-e) and during walking dynamics (g-j).

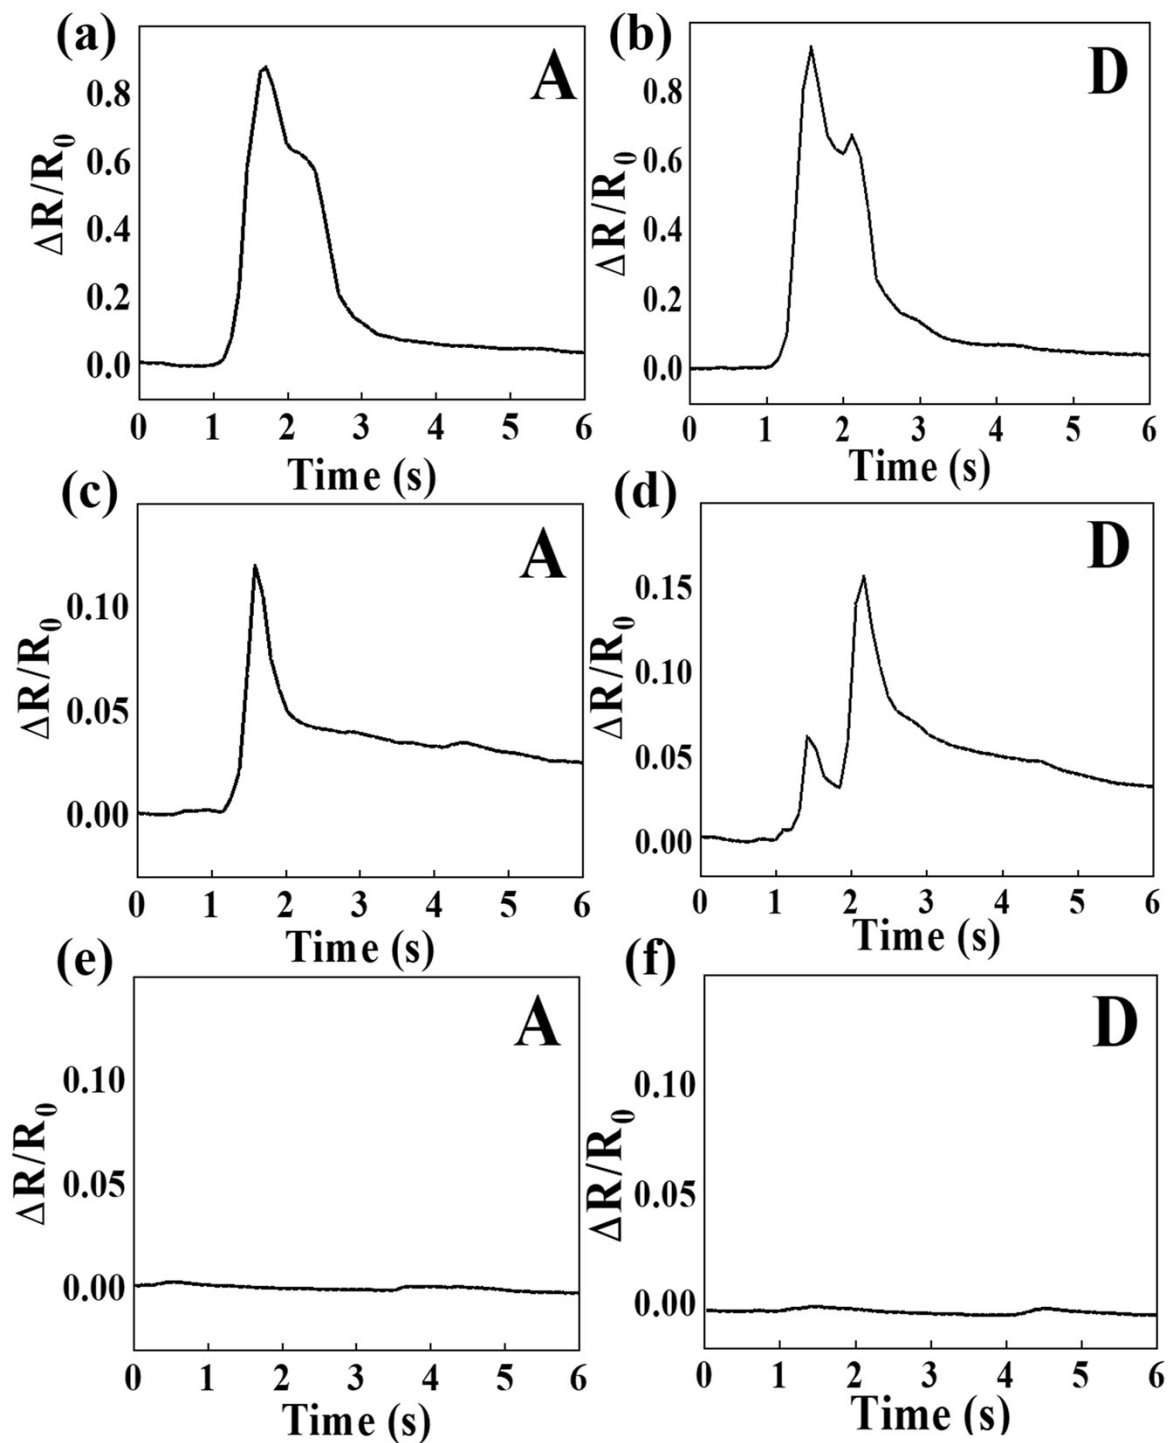

**Figure S5.** (a) and (b) The relative resistance changes around lips when speaking “A” and “D” without making noise. (c) and (d) The relative resistance changes at soundtrack when speaking “A” and “D”. (e) and (f) The relative resistance changes at soundtrack when speaking “A” and “D” without making noise.

**Movie S1.** Application of lip-reading recognition system in voice broadcast and text display.

**Movie S2.** Barrier-free communication of volunteers with damaged vocal cords with normal people through a lip-reading recognition system.
